# Supplementary material for: Analyzing and Predicting User Participations in Online Health Communities: A Social Support Perspective
Source: PubMed Central journal article supplement (PMC5422656; doi:10.2196/jmir.6834), 2017-04-24
Supplement: jmir_v19i4e130_app3.pdf [file jmir_v19i4e130_app3.pdf]

The hazard  $h_i(t)$  represents the events occur to individual  $i$  at time  $t$  (defined in Equation 1),

$$h_i(t) = h_0(t) * \exp\{\beta_1 x_{i1} + \beta_2 x_{i2} + \dots + \beta_k x_{ik}\} \quad (1)$$

where the baseline hazard function  $h_0(t)$  can be any function of time  $t$  as long as  $h_0(t) > 0$ .

$x_i$  and  $\beta_i$  represent independent variables and corresponding coefficients. Equation 1 can also be formulated as Equation 2, where the ratio of two individuals' hazard functions does not depend on time  $t$ .

$$\frac{h_i(t)}{h_j(t)} = \exp\{\beta_1 (x_{i1} - x_{j1}) + \dots + \beta_k (x_{ik} - x_{jk})\} \quad (2)$$

By using Maximum Likelihood Estimation,  $\beta$  can be estimated with regards to the hazard.

$\beta_k = 0$  would indicate that independent variable  $x_k$  has no association with survival time;  $\beta_k > 0$  means that independent variable  $x_k$  induces a higher hazard of event occurring, and vice versa. Correspondingly,  $\exp\{\beta_k\}$  is the hazard ratio of independent variable  $x_k$ .
